1 **Classification:** Biological Sciences, Plant biology

2

3 **Title:** Unleashing floret fertility by a mutated homeobox gene improved grain yield during  
4 wheat evolution under domestication

5

6 **Authors:**

7 Shun Sakuma<sup>1,2,3</sup>✉, Guy Golan<sup>4</sup>, Zifeng Guo<sup>2</sup>, Taiichi Ogawa<sup>1,5</sup>, Akemi Tagiri<sup>1</sup>, Kazuhiko  
8 Sugimoto<sup>1,5</sup>, Nadine Bernhardt<sup>2</sup>, Jonathan Brassac<sup>2</sup>, Martin Mascher<sup>2,6</sup>, Goetz Hensel<sup>2</sup>, Shizen  
9 Ohnishi<sup>7</sup>, Hironobu Jinno<sup>7</sup>, Yoko Yamashita<sup>8</sup>, Idan Ayalon<sup>4</sup>, Zvi Peleg<sup>4</sup>, Thorsten  
10 Schnurbusch<sup>2,9</sup>✉, Takao Komatsuda<sup>1,5</sup>✉

11

12 **Affiliations:**

13 <sup>1</sup>National Institute of Agrobiological Sciences (NIAS), 2-1-2 Kan-non-dai, Tsukuba, Ibaraki 305-8602, Japan; <sup>2</sup>Leibniz Institute of  
14 Plant Genetics and Crop Plant Research, 06466 Seeland/ OT Gatersleben, Germany; <sup>3</sup>Faculty of agriculture, Tottori University,  
15 4-101 Koyama-cho Minami, Tottori 680-8553, Japan; <sup>4</sup>The Robert H. Smith Institute of Plant Sciences and Genetics in Agriculture,  
16 The Hebrew University of Jerusalem, Rehovot 7610001, Israel; <sup>5</sup>Institute of Crop Science, National Agriculture and Food Research  
17 Organization, Tsukuba, Ibaraki 305-8518, Japan; <sup>6</sup>German Centre for Integrative Biodiversity Research (iDiv) Halle-Jena-Leipzig,  
18 Deutscher Platz 5e, 04103 Leipzig, Germany; <sup>7</sup>Kitami Agricultural Experiment Station, Hokkaido Research Organization,  
19 Tokoro-gun, Hokkaido, Japan; <sup>8</sup>Central Agricultural Experiment Station, Hokkaido Research Organization, Yubari-gun, Hokkaido,  
20 Japan; <sup>9</sup>Faculty of Natural Sciences III, Institute of Agricultural and Nutritional Sciences, Martin Luther University  
21 Halle-Wittenberg, Von-Seckendorff-Platz 3, 06120 Halle, Germany

22

23 ✉**Corresponding authors:**

24 Shun Sakuma

25 Faculty of agriculture, Tottori University, 4-101 Koyama-cho Minami, Tottori 680-8553, Japan

26 Phone: +81 857-31-5864

27 Email: [ssakuma@tottori-u.ac.jp](mailto:ssakuma@tottori-u.ac.jp)

28

29 Thorsten Schnurbusch

30 Leibniz Institute of Plant Genetics and Crop Plant Research, 06466 Seeland/ OT Gatersleben, Germany

31 Phone: +49-39482-5341

32 Email: [schnurbusch@ipk-gatersleben.de](mailto:schnurbusch@ipk-gatersleben.de)

33

34 Takao Komatsuda

35 Institute of Crop Science, National Agriculture and Food Research Organization (NARO), Kannondai 2-1-2, Tsukuba 305 8518,  
36 Japan

37 Phone: +81 29-838-7482

38 Email: [takao@affrc.go.jp](mailto:takao@affrc.go.jp)

39

40 **Keywords:**

41 floret fertility, grain number, duplication, HD-Zip I transcription factor, wheat

42 **Abstract**

43 Floret fertility is a key trait to determine the number of grains per inflorescence in cereals.  
44 During wheat (*Triticum* sp.) evolution, floret fertility has been increased and current bread  
45 wheat (*T. aestivum* L.) produces three to five grains per spikelet; however, little is known about  
46 the genetic basis controlling floret fertility. Here we identify the quantitative trait locus *Grain*  
47 *Number Increase 1* (*GNI1*), encoding a homeodomain leucine zipper class I (HD-Zip I)  
48 transcription factor. *GNI1* evolved in the Triticeae through gene duplication and  
49 functionalization. *GNI1* was predominantly expressed in the most apical floret primordia and  
50 parts of the rachilla, suggesting that *GNI1* inhibits rachilla growth and development. *GNI1*  
51 expression decreased during wheat evolution, and as a consequence, more fertile florets and  
52 grains per spikelet are being produced. Genetic analysis revealed that the reduced-function  
53 allele of *GNI1-A* contributes to increase the number of fertile florets per spikelet. The  
54 knockdown of *GNI1* in transgenic hexaploid wheat improved fertile floret and grain number.  
55 Furthermore, wheat plants carrying the impaired allele increased grain yield under field  
56 conditions. Our findings illuminate that gene duplication and functionalization generated  
57 evolutionary novelty for floret fertility (i.e. reducing floral numbers) while the mutations  
58 towards increased grain production were under selection during wheat evolution under  
59 domestication.

60

61 **Significance Statement**

62 Grain number is a fundamental trait for cereal grain yield; but its underlying genetic basis is  
63 mainly unknown in wheat. Here we show for the first time a direct link between increased floret  
64 fertility, higher grain number per spike and higher plot-yields of wheat in the field. We have  
65 identified *GNI1* gene encoding an HD-Zip I transcription factor responsible for increased floret  
66 fertility. The wild type allele imposes an inhibitory role specifically during rachilla development,  
67 indicating that expression of this protein actively shuts-down grain yield potential; whereas, the  
68 reduced-function allele enables more florets and grains to be produced. *GNI1* evolved through  
69 gene duplication in Triticeae and its mutations were under parallel human selection during  
70 wheat and barley evolution under domestication.

71 \body

72 **Introduction**

73 The tribe Triticeae within the Pooideae subfamily of the Poaceae family consists of  
74 approximately 30 genera with 360 species including economically important cereal crops such  
75 as bread wheat (*Triticum aestivum* L.), durum wheat [*T. turgidum* ssp. *durum* (Desf.) MacKey],  
76 barley (*Hordeum vulgare* L.) and rye (*Secale cereale* L.) (1). Triticeae plants produce an  
77 unbranched inflorescence called spike. While most species develop a single spikelet on each  
78 rachis node like wheat; others can produce two or more spikelets on each rachis node (2). The  
79 wheat spike is consisting of several spikelets with a terminal spikelet at the apex while each  
80 spikelet generates an indeterminate number of florets attached to a secondary axis, called  
81 rachilla (3, 4). Final grain number per spikelet is determined by the fertility of each floret within  
82 a spikelet (5, 6). At the white anther stage, a wheat spikelet normally produces up to ten to 12  
83 floret primordia (**Fig. 1A**); however, during development more than ~70% of the florets will  
84 undergo degeneration. This phenomenon is known as the floret abortion (6, 7). Despite its  
85 prominent importance for grain number determination and the potential for grain yield  
86 improvement, little is known about the genetic basis of floret fertility in wheat.

87

88 Two polyploidization events produced allohexaploid bread wheat consisting of three  
89 subgenomes (B, A, and D)(8, 9). The wild emmer [*T. turgidum* ssp. *dicoccoides* (Körn.) Thell.;  
90  $2n=28$ , BBAA] allotetraploid genome arose about 0.36 to 0.5 million years ago, presumably  
91 through a single event of hybridization and spontaneous chromosome doubling. The  
92 A-subgenome originated from *T. urartu* ( $2n=14$ , AA-genome) and the B-subgenome from  
93 *Aegilops speltoides* ( $2n=14$ , SS-genome) or an extinct closely-related species. Domesticated  
94 emmer wheat (*T. turgidum* ssp. *dicoccum* Schrank) was derived from wild emmer and led to  
95 durum wheat, which is most widely cultivated tetraploid wheat. A second polyploidization  
96 event ~7,000 years ago between domesticated tetraploid wheat and *Ae. tauschii* ( $2n=14$ ,  
97 DD-genome) produced the ancestral allohexaploid wheat (*T. aestivum*;  $2n=42$ , BBAADD). As  
98 the ploidy level increases, more floret/grain number per spikelet was produced in *Triticum*  
99 species: one or two grains per spikelet in diploid (*T. urartu* and *T. monococcum*), two or three in  
100 tetraploid, and more than three in hexaploid wheat (**Fig. 1B–H**) (10).

101

102 Genetic diversity of grass inflorescences determines its reproduction system, and hence, number  
103 of branches, flowers and grains (11). The grass inflorescences are classified as a "raceme"  
104 having one central monopodial axis, a "panicle" with primary and secondary branches, or a  
105 "spike" without pedicels (flower stalk). Following cereals domestication, inflorescence

106 architecture has been improved as more reproductive branches, called spikelets, produced more  
107 grains (12). Since inflorescence architecture has been a target for selection, a better  
108 understanding of the genes that regulate spikelet development could help increase cereal grain  
109 yield. The regulation of floret number per spikelet is a main determinant of spikelet architecture.  
110 One traditional classification of ‘spikelet’ is whether it contains a determinate or indeterminate  
111 number of florets. For example, the spikelet of rice (*Oryza sativa* L.), barley, sorghum  
112 (*Sorghum bicolor* L.) and maize (*Zea mays* L.) are determinate, producing only one floret in rice  
113 and barley and two florets per spikelet in sorghum and maize. On the other hand, an  
114 indeterminate number of florets per spikelet are produced in wheat and oat (*Avena sativa* L.).  
115 Interestingly, there are sterile florets in common independent of the determinacy of floret  
116 number; e.g. two lateral florets in two-rowed barley, a lower floret in maize and sorghum, or  
117 several apical florets in wheat and oat.  
118  
119 Recent studies have suggested that variations in grain number per spike had a larger effect on  
120 wheat grain yield than variations in grain size (13, 14). Quantitative trait loci (QTLs) affecting  
121 grain number per spike in wheat have been mapped; but their underlying gene(s) are yet to be  
122 discovered (15-18). Genome-wide association analyses among European winter wheats revealed  
123 a QTL on chromosome 2AL conferring enhanced grain number per spikelet (19); however the  
124 responsible gene has not been elucidated. In this study, we investigated natural variations for  
125 grain number per spikelet in polyploid wheats and their wild relatives and identify the  
126 underlying gene for improved floret fertility and enhanced grain number. We also explored the  
127 evolutionary trajectory of floret fertility during wheat evolution.

128 **Results**

129 **QTL cloning for grain number per spikelet**

130 To understand the genetic regulation in the number of fertile florets per spikelet, a population of  
131 recombinant inbred substitution lines derived from a cross between durum wheat cv. Langdon  
132 (LDN) and the substitution line DIC-2A(20) was investigated. The DIC-2A contained the  
133 chromosome 2A from the wild emmer wheat accession ISR-A in the LDN genetic background  
134 and produced two grains per spikelet on average while LDN has 2.4 on average (**Fig. 2A**).  
135 Increased grain number per spikelet in LDN was mainly due to increased grains in basal and  
136 central spike parts (**Fig. 2B**). QTL analysis detected a single major QTL with a log<sub>10</sub> odds  
137 (LOD) score of 18.71 on chromosome 2AL, explaining 61% of the phenotypic variance (**Fig.**  
138 **2C**). To further limit the region, backcrossed recombinant lines were developed and the QTL  
139 was mapped as a simple Mendelian locus, named *Grain Number Increase 1*, *GNII-A* (**Fig. 2D**).  
140 Fine mapping delimited the *GNII-A* locus within a 5.4 Mbp interval containing 26 putative  
141 genes, including one that encoded an HD-Zip I transcription factor protein, which is the closest  
142 wheat homolog of barley *Six-rowed spike 1* gene *vrs1* (21) (**SI Appendix, Table S1**).  
143 Comparison of the parental sequences revealed a single amino acid substitution (N105Y: 105  
144 asparagine to tyrosine) in the highly conserved homeodomain (**Fig. 2E**). The recombinant plants  
145 carrying the LDN allele (105Y) showed a significantly higher grain number per spikelet than  
146 the plants carrying the DIC-2A allele (105N) mainly due to an additive effect of the LDN allele  
147 (**Fig. 2F**). Interestingly, the mutation in LDN was identical to the one already found in barley  
148 six-rowed spike mutant *Int-d.41* allelic at the *vrs1* locus (21), strongly suggesting that the  
149 HD-Zip I protein encoded by LDN allele most likely lost or reduced its function.

150

151 To verify the inhibitory role of *GNII-A*, we knocked-down its transcript levels using RNA  
152 interference (RNAi). An RNAi construct was transformed into hexaploid wheat variety  
153 Bobwhite, which contains the 105N allele. We obtained four transformants carrying  
154 independent transgenic events and construct-positive plants showed more florets and grains per  
155 spikelet on average than construct-negative plants (**Fig. 2G, H**). Reduced transcript levels of  
156 *GNII* were confirmed from all transgenic events (**Fig. 2H**). These results corroborate the  
157 hypothesis that functional *GNII-A* inhibits floret development in wheat. Other traits such as  
158 plant height, spike number per plant, spike length, spikelet number per spike and grain size were  
159 not significantly changed indicating the spatial specificity of the gene function (**SI Appendix,**  
160 **Fig. S1**).

161 **Reduced-function allele of *GNI1-A* improved yield**

162 Kitahonami, one of the highest-yielding bread wheat varieties in Japan, also carried the 105Y  
163 allele and showed 4.26 grains per spikelet on average (**Fig. 2I**). Pedigree analysis revealed that  
164 the cultivars with the 105Y allele had significantly more grains per spikelet than the other  
165 alleles (4.03 for 105Y; 3.21 for 105N and 3.07 for 105K), and the 105Y allele seems to be  
166 introduced from UK cultivar, Norman (**SI Appendix, Fig. S2**). Through TILLING of  
167 Kitahonami, we obtained heterozygous M2 plants with an Y105N mutation. As expected, the  
168 homozygous 105N mutant plants had significantly fewer florets/grains per spikelet/spike and  
169 grain weight per plant compared with carriers of the 105Y allele from the same M3 families  
170 (**Fig. 2I**). The change of grain number per spikelet was mainly from the basal and central parts  
171 of spike in agreement with the finding in tetraploid wheat. Other traits were not significantly  
172 changed (**SI Appendix, Fig. S3**). These results strongly support the idea that the N105Y  
173 mutation of the *GNI1-A* allele contributes to more grains per spikelet due to lowered apical  
174 floret abortion during spikelet development.

175

176 To reveal the actual effects of the *GNI1-A* allele on grain yield in the field, yield tests were  
177 conducted (**SI Appendix, Fig. S4**). Kitahonami mutants derived from M4 families (105N and  
178 105Y) were compared in two environments (Kitami and Naganuma, Hokkaido, Japan) and 4  
179 and 3 replications in each site, respectively. The results showed that the plants carrying the  
180 105Y allele increased grain plot-yield from 10 to 30% in both sites. Grain number per spike was  
181 slightly increased in the 105Y allele and thousand grain weight and number of spikes per plant  
182 were not changed (**SI Appendix, Fig. S4**). Plant biomass was significantly reduced for the 105N  
183 allele in the Kitami site. Harvest index was increased in the 105Y allele in both fields. This data  
184 indicates that the *GNI1-A* 105Y allele contributes to the improved grain yields under field  
185 conditions.

186

187 ***GNI1* transcripts accumulate in rachilla**

188 *GNI1* mRNA was localized by *in situ* hybridization of einkorn wheat in spikelet meristems,  
189 which generates floret meristems on its lower flanks (**Fig. 3A–F**). After the differentiation of 2<sup>nd</sup>  
190 and 3<sup>rd</sup> floret primordia at the terminal spikelet stage, *GNI1* signals were localized in the  
191 spikelet meristem and apical floret (**Fig. 3B**). *GNI1* signals continued to localize to the spikelet  
192 meristem at the white anther stage and were clearly detected in the rachilla bearing the florets  
193 (**Fig. 3C–E**). These transcript data imply that *GNI1* inhibits apical floret development in  
194 spikelets beyond floret 3 at least partly by inhibiting rachilla growth and development.

195

196 Quantitative RT-PCR analysis showed that *GNII-A* was predominantly expressed in immature  
197 spikes (**Fig. 3G**). Peak mRNA levels were found from the white to green anther stage  
198 corresponding to maximum floret primordia number (6). This pattern was conserved among  
199 diploid einkorn and tetraploid wheat (**SI Appendix, Fig. S5**); however, *GNII-D* showed half of  
200 the *GNII-A* transcript levels and *GNII-B* transcript levels were negligible in the organs  
201 examined although its gene structure is conserved (**SI Appendix, Fig. S6**).

202  
203 To better understand the underlying molecular mechanism related to the *GNII-A* mutation, an  
204 RNA-seq profiles of the 105N and 105Y alleles derived from Kitahonami-mutant M4 families  
205 were compared. The results revealed that nitrogen metabolic processes, sucrose metabolic  
206 processes, and G-protein beta/gamma-subunit complex binding related genes were up-regulated  
207 in the 105Y allele compared to 105N mutant allele supporting the increased grain number  
208 phenotype in 105Y (**Datasets S1 and S2**). In accordance with the improved floret fertility found  
209 in 105Y, we found that the florigenic *Flowering locus T* homolog, *FT-D1*, was upregulated;  
210 while both other homoeo-alleles, *FT-A1* and *FT-B1*, were expressed at the same level in spikes  
211 at white and green anther stages. Very similar expression patterns were observed in public  
212 RNA-seq database (**SI Appendix, Fig. S7**). These results suggest that *FTI* may function as a  
213 floral promoting factor during early floret development in wheat; while differential upregulation  
214 of *FT-D1* might be the consequence of higher floral activity in a *GNII-A* 105Y allele  
215 background.

#### 216 217 **Natural variation of *GNII-A* in wheat**

218 To interrogate natural variation at the *GNII-A* locus, 72 tetraploid wheat accessions including  
219 wild and domesticated emmer and durum wheat were sequenced. The panel revealed nine  
220 haplotypes (**Fig. 4A, SI Appendix, Table S2**). Only durum wheat carried the 105Y allele and  
221 showed a significantly higher number of grains per spikelet compared with wild and  
222 domesticated emmer wheat (**Fig. 4B**). Furthermore, we examined grains per spikelet in three  
223 different growth conditions. The results indicated that lines carrying the 105Y allele had a  
224 higher number of grains per spikelet in all environments with high broad-sense heritability ( $H_{bs}$   
225 = 0.8), and stable trait expression even under low-yielding conditions (Ruhama site; **Fig. 4C**). In  
226 bread wheat, sequencing revealed three haplotypes among 210 European winter wheat cultivars.  
227 Hap1 and 2 contained the 105N allele and Hap3 contained the 105Y allele (**Fig. 4D, SI**  
228 **Appendix, Table S3**). Number of florets at the green anther stage, indicative of maximal grain  
229 number potential, was not significantly different between these three haplotypes (**Fig. 4E**).  
230 Cultivars carrying Hap3 showed more grains per spikelet at apical (2.97) and central (3.95)

231 positions of the spike and on average (3.52) compared to the other cultivars carrying Hap1 (2.45  
232 at apical, 3.58 at central, and 3.18 on average) and Hap2 (2.53 at apical, 3.64 at central, and 3.22  
233 on average)(**Fig. 4F**). Furthermore, Hap3 cultivars showed more grains per spike, a higher spike  
234 fertility index and ratio between spike and stem dry weight due to reduced stem and leaf dry  
235 weight (*SI Appendix, Fig. S8*).

236

### 237 **Evolution of *GNI1* in Triticeae**

238 To shed more light on the evolution of *GNI1* (i.e. *HOX1*) in Triticeae, diverse collections of  
239 wild species were sequenced by nucleotide sequence capture. All 14 genera examined in this  
240 study had *HOX2* homologs, which is in line with the fact that *HOX2* is highly conserved in the  
241 orthologous region in grass species (22). *HOX1* homologs were only present in seven genera;  
242 *Hordeum*, *Dasyphyrum*, *Secale*, *Taeniatherum*, *Aegilops*, *Amblyopyrum*, and *Triticum* (*SI*  
243 *Appendix, Fig. S9*). There were no taxa among Triticeae carrying only *HOX1*. These results  
244 indicate that the duplication of the ancestral gene may have occurred after the divergence of  
245 Triticeae. There might be two gene lineages: one including seven genera, such as  
246 *Psathyrostachys*, *Pseudoroegneria*, *Agropyron*, maintained one copy without duplication event,  
247 while the other seven genera, such as *Hordeum*, *Secale*, *Triticum*, retained two copies.

248

249 To query the relationship between the number of fertile florets and ploidy level, we investigated  
250 diploid, tetraploid and hexaploid wheat relatives. As expected, a higher ploidy level increased  
251 floret fertility except for *Aegilops* species. Diploid A-genome progenitor, *T. urartu* produced  
252 three florets and a single grain per spikelet (**Fig. 5A, B**), while *Aegilops* species (S-,  
253 D-genomes) showed three to six florets and one to four grains per spikelet (**Fig. 5A, B**).  
254 Tetraploid wheat showed four to five florets and two to three grains. Hexaploid wheat showed  
255 five to seven florets and three to five grains (**Fig. 5A, B**). To further test the relationship  
256 between fertile floret number and *GNI1* transcript levels, qRT-PCR was performed. We found a  
257 negative trend between the number of florets or grains per spikelet and *GNI1* mRNA expression  
258 level (**Fig. 5C**), suggesting that the lower *GNI1* expression results in higher number of fertile  
259 florets in both diploid and polyploid wheat. The implication was a functional diversification not  
260 only between *HOX1* and *HOX2* but also among *HOX1* genes in the *HOX1*-carriers in the  
261 process of their speciation.



262 **Discussion**

263 In this study, we show that the *GNI1* gene is a key determinant of grain number by controlling  
264 floret fertility in wheat. *GNI1* encodes an HD-Zip I transcription factor that is preferentially  
265 expressed during rachilla growth and development. Reduced-function mutation of *GNI1*  
266 increases the grain number and yield without adverse effects on the number of spikes, number  
267 of spikelet per spike and grain size. These results strongly suggest that improving floret fertility  
268 (i.e. relieving floret abortion) is a promising breeding strategy for enhancing grain yield in the  
269 unbranched "spike" type inflorescence like wheat. Increased floret numbers were observed in  
270 mutated *APETALA2* (*AP2*) gene family transcription factors, such as *ids1* in maize and *Q* in  
271 wheat, which control the spikelet meristem fate; however, their floret fertility is relatively low  
272 (23, 24). This indicates that determining appropriate number of floret primordia, not  
273 indeterminate number is useful for improving grain number. Optimization of both HD-Zip I (i.e.  
274 *GNI1*) and *AP2* genes may help improving floret fertility, but its relationships remain elusive.  
275 Identifying network genes under the control of *GNI1* and investigating the other genes  
276 responsible for increased floret fertility will be important to further enhance grain yield in  
277 wheat.

278  
279 HD-Zip class I genes, including *GNI1* in wheat, have evolved through a series of gene  
280 duplications, functionalizations and mutations (25-27). *GNI1* evolved through gene duplication  
281 in Triticeae after the separation of Triticeae and Bromoae. Only seven genera, such as *Hordeum*,  
282 *Secale*, *Triticum*, out of fourteen genera tested in this study experienced the gene duplication.  
283 Seven genera, such as *Psathyrostachys*, *Pseudoroegneria*, *Agropyron*, maintained one copy  
284 without duplication event. This notion was well supported by plenty of repetitions (species and  
285 accessions) from each genus. Truncated HD-Zip I gene sequences were not evident from the  
286 exome sequencing, indicating that the missing of the HD-Zip I in the second group was not a  
287 consequence of spontaneous, independent deletions of the genes, but rather they were not  
288 duplicated from the origin of their common ancestor. Interestingly, only plants of the first group  
289 (with duplicated copies) were domesticated as cereal crops.

290  
291 *GNI1* is the ortholog of the barley *Vrs1* gene, which controls lateral floret fertility. *Vrs1* inhibits  
292 the development of lateral florets, especially pistil (21, 27), whereas loss-of-function mutations  
293 produce up to three times as many grains per rachis node. While *Vrs1* mRNA signals  
294 accumulate in rachilla and pistil (27), *GNI1* mRNA is highly accumulating during rachilla  
295 growth and development, suggesting that this is its ancestral role. In addition, barley *Vrs1* may  
296 have acquired a specific transcriptional expression pattern characteristic for the evolution of

297 lateral spikelet/floret/pistil development within the genus *Hordeum*. Our expression analysis  
298 further suggests that *Aegilops* species (S and D genome) are likely to be pseudogenized,  
299 whereas diploid *Triticum* (A genome) and *Hordeum* (H genome) species are functionalized (27).  
300 These *GNI1/Vrs1*-mediated floral changes follow a theory of regulatory evolution: that  
301 morphological diversity is driven by changes in gene expression pattern that minimize  
302 pleiotropic effects while simultaneously maximizing adaptation (28, 29).  
303  
304 The single amino acid substitution in a conserved domain causing the reduced-function  
305 mutation (105Y) of *GNI1-A* was selected after the divergence of durum wheat. Previous study  
306 showed that six-rowed barley is originated from domesticated two-rowed type through  
307 mutations of *Vrs1* (21). Taken together, these data suggest that the mutation for increased grain  
308 number have undergone parallel selection during post-domestication of wheat and barley (30).  
309 Its high allele frequency among durum wheats (96%) supports the notion for a selection towards  
310 increased grain number. The mutant allele (105Y) is absent in any wild and domesticated  
311 emmer wheat analyzed so far (among 64 accessions) suggesting that the mutation had negative  
312 effect on plant's fitness under natural conditions. During wheat evolution under domestication,  
313 the mutant allele become more beneficial in human-made environment, i.e. increased yields,  
314 and such strong selection pressure resulted in fixation of the mutant allele in durum wheat. The  
315 wildtype (105N) and mutant (105Y) alleles occurred in a 2:1 ratio in the European winter bread  
316 wheat gene pool, suggesting that the 105Y allele may have entered the breeding programs more  
317 recently. *GNI1* heritability was high and its allele effect was stable across environments (**Fig.**  
318 **4C and SI Appendix, Fig. S4**), supporting the usefulness of the reduced-function allele in  
319 wheat breeding programs to increase grain yield around the world.

## 320 **Methods**

### 321 **QTL mapping**

322 A population of 94 Recombinant Inbred Substitution Lines (RISLs) derived from a cross  
323 between durum wheat [*T. turgidum* ssp. *durum* (Desf.) MacKey] cv. Langdon (LDN) and the  
324 chromosome substitution line DIC-2A, which contains the chromosome 2A of wild emmer  
325 wheat [*T. turgidum* ssp. *dicoccoides* (Körn.) Thell.] accession FA-15-3 (ISR-A) against the  
326 LDN genetic background (20), was used for QTL analysis. The experiment was conducted in an  
327 insect-proof screen-house at the experimental farm of the Hebrew University of Jerusalem in  
328 Rehovot, Israel (34°47' N, 31°54' E; 54 m above sea level). A complete random block design,  
329 with three replicates (single plant) was applied. Three spikes per plant were characterized for  
330 number of spikelets and number of grains per spike. Number of grains per spikelet was  
331 calculated accordingly. Linkage analyses and map construction were performed based on the  
332 evolutionary strategy algorithm included in the MultiPoint package  
333 (<http://www.MultiQTL.com>), as previously described (31). QTL analysis was performed with  
334 the MultiQTL package, using the general interval mapping for RIL-selfing populations. The  
335 hypothesis that one locus on the chromosome has an effect on a given trait ( $H_1$ ) was compared  
336 with the null hypothesis ( $H_0$ ) that the locus had no effect on that trait. Once the genetic model  
337 was chosen, 10,000 bootstrap samples were run to estimate the standard deviation of the main  
338 parameters: locus effect, its chromosomal position, its LOD score and the proportion of  
339 explained variation (PEV).

340

### 341 **Fine mapping**

342 For fine mapping of *GNI1-A* locus, three RISLs containing the DIC-2A allele in the QTL  
343 interval (RISL #4, #63, #102) were backcrossed to LDN and then self-pollinated to produce  
344 BC<sub>1</sub>F<sub>2</sub>. To identify recombinants within the genomic region including the *GNI-1A* locus, 1006  
345 BC<sub>1</sub>F<sub>2</sub> plants were screened with microsatellites markers *Xgwm558* and *Xcfa2043*. In the next  
346 generation, BC<sub>1</sub>F<sub>3</sub> families (8 seedlings per family) were screened again with markers *Xgwm558*,  
347 *Xcfa2043* and *Xhbg494*. Homozygous recombinants were genotyped with 12 additional markers  
348 (**SI Appendix, Table S4**) developed based on polymorphism between wild and domesticated  
349 emmer wheat genomes (32). The phenotype of 17 BC<sub>1</sub>F<sub>4</sub> homozygous recombinants was scored  
350 in the field. A split plot, complete random block design ( $n=5$ ), was carried out in insect-proof  
351 screen-house at the experimental farm of the Hebrew University of Jerusalem in Rehovot, Israel.  
352 Each plot (1×1 meter) contained twenty plants per line. Five spikes per plot were characterized  
353 for number of spikelets per spike and number of grains per spike. Number of grains per spikelet  
354 was calculated accordingly.

355

356 To examine the effect of the *GNI1-A* allele across environments, three field experiments were  
357 analyzed. The first experiment was conducted in 2015-16 in Rehovot, with 13 RISLs and their  
358 parental lines, LDN and DIC-2A. Two field experiments were conducted in 2016-17, in  
359 Rehovot and in Ruhama (31°29' N, 34°42' E, 166m above sea level) using 18 BC<sub>1</sub>F<sub>4</sub> lines and  
360 LDN. All experiments were conducted as described above.

361

### 362 **Transformation of wheat**

363 We used a 323-bp fragment from the *GNI1-A* as RNA interference (RNAi) trigger. This  
364 fragment was amplified using specific primers (*SI Appendix, Table S4*) and cloned it into a  
365 pENTR D-TOPO vector (Thermo Fisher Scientific, Waltham, MA USA). The fragment was  
366 transferred by LR recombination reaction into a pANDA-b vector in which transgene  
367 expression was under control of the maize *Ubiquitin1* promoter (33). Transgenic wheat plants  
368 were produced by a particle bombardment method using immature embryos of spring-type  
369 bread wheat variety Bobwhite S-26 obtained from CIMMYT (34). Transgene-positive plants  
370 were confirmed by PCR using vector specific primers (*SI Appendix, Table S4*).

371

### 372 **TILLING**

373 Winter-type bread wheat cv. Kitahonami was used as donor plants for mutagenesis. The  
374 mutations were induced by gamma-ray irradiation (250 Gy) using mature grains. M1 plants  
375 were grown in greenhouse and all M2 grains were harvested. The DNA was extracted from M2  
376 plants and used as template of TILLING. *GNI1-A* specific primers (*SI Appendix, Table S4*)  
377 were used to amplify the fragment. M3 family was evaluated in the NIAS experimental field in  
378 Tsukuba, Japan (36°01' N, 140°06' E).

379

### 380 **Yield trials**

381 Kitahonami mutants (105Y allele and 105N allele) at M4 generation were used. The plants were  
382 grown in the Kitami Agricultural Experiment Station (43°44'N, 143°43'W, Kitami, Hokkaido,  
383 Japan) and the Central Agricultural Experiment Station (43°3'N, 141°45'W, Naganuma,  
384 Hokkaido, Japan). At Kitami, each genotype consisted of four plots (5.4m<sup>2</sup> per plot, 200 grains  
385 per m<sup>2</sup>). At Naganuma, each genotype consisted of three plots (4.8m<sup>2</sup> per plot, 200 grains per  
386 m<sup>2</sup>). 156 kg N, 175 kg P, 70 kg K/ha at Kitami and 140 kg N, 125 kg P, 50 kg K/ha at  
387 Naganuma were applied.

388

### 389 **RNA extraction and Absolute Quantitative Real-Time PCR**

390 Immature spikes were developmentally staged by observation under the stereoscopic  
391 microscope (35). Total RNA was extracted using TRIzol (Invitrogen) and quantified using  
392 NanoDrop 1000 (Thermo Fisher Scientific). To remove genomic DNA contamination, RNA  
393 was treated with RNase-free DNase (Takara Bio). First-strand cDNA was synthesized with  
394 SuperScript III (Invitrogen) and first-strand cDNA derived from 25 ng RNA was used as  
395 template. Transcript levels of each gene were measured by quantitative real-time PCR using a  
396 StepOne Real-Time PCR System (Applied Biosystems) and THUNDERBIRD SYBR qPCR  
397 Mix Kit (Toyobo) according to the manufacturers' protocols. Primers used for qRT-PCR are  
398 listed in *SI Appendix, Table S4*. Each gene fragment was cloned into pBluescript II KS (+).  
399 Plasmid DNA harboring each gene fragment was used to generate standard curves for absolute  
400 quantification. qRT-PCR analysis was performed at least three times for each sample.  
401 Biological replicates of at least three independent RNA extractions per sample were performed.  
402 The *Actin* gene was used to normalize the RNA level for each sample.

403

#### 404 ***In situ* mRNA hybridization analysis**

405 The *GNII* gene segment comprising part of the 3'-UTR (300 bp) was amplified from cDNA  
406 isolated from immature wheat spikes using specific primers (*SI Appendix, Table S4*). The PCR  
407 product was cloned into the pBluescript II KS (+) vector (Stratagene). Two clones with different  
408 insert orientations were linearized with *EcoRI* and were used as templates to generate antisense  
409 and sense probes using T3 RNA polymerase. *In situ* hybridization was conducted as in  
410 Komatsuda, *et al.* (21).

411

#### 412 **RNA-sequencing and analysis**

413 For RNA-sequencing (RNA-seq), immature inflorescences at the white anther stage and green  
414 anther stage of Kitahonami M4 families (105Y allele and 105N allele) were collected. Total  
415 RNA was extracted using TRIzol (Invitrogen) and treated with DNase I (Roche). Quality of  
416 RNA was measured using an Agilent 2100 Bioanalyzer (Agilent Technologies). RNA-seq  
417 libraries were prepared using the NEBNext Ultra™ RNA Library Prep Kit for Illumina (NEB,  
418 USA) and sequenced using a HiSeq 4000 (Illumina).

419

420 Transcript abundance (transcripts per million reads) was quantified by pseudo-alignment against  
421 the representative transcripts of high-confidence and low-confidence genes annotated on the  
422 IWGSC RefSeq V1 pseudomolecules (36) using Kallisto version 0.43.1 (37). Abundance  
423 estimates were imported into the R statistical environment (38). Analysis of differential gene  
424 expression was carried out with Limma-voom (39, 40). Differentially expressed genes (DEGs)

425 were required to have  $\log_2$  fold change  $\geq 2$  or  $\leq -2$  between contrasted conditions and an  
426 adjusted  $P$ -value  $\leq 0.05$  after Benjamini-Hochberg correction. Enrichment of gene ontology  
427 (GO) terms was analyzed with topGO (41) using the GO term assignment of IWGSC, 2018.

428

#### 429 **Haplotype analysis**

430 For resequencing, 72 tetraploid wheat accessions including 35 wild emmer, 14 domesticated  
431 emmer and 23 durum were used (**SI Appendix, Table S2**). Out of 72, 30 accessions were  
432 evaluated for the grain number per spikelet. A haplotype analysis was performed based on  
433 resequencing data of the *GNII-A* (1,053 bp) from tetraploid wheat. Sequence alignments were  
434 performed with ClustalW using MEGA7 software (42). A median-joining network (43) was  
435 constructed using the software programs DNA Alignment version 1.3.3.2 and Network version  
436 5.0.0.1 (Fluxus Technology) with default parameters (epsilon = 0; frequency . 1 criterion =  
437 inactive; The ratio of transversion:transition = 1:1; Criterion = Connection cost; External  
438 rooting = inactive; MJ square option = inactive). A total of 210 European winter bread wheat  
439 cultivars (**SI Appendix, Table S3**) were used for resequencing *GNII-A* with specific primers (**SI**  
440 **Appendix, Table S4**). Phenotypic data from Guo, *et al.* (19) was reanalyzed with *GNII-A*  
441 haplotype data (**Dataset S3**).

442

#### 443 **Phylogenetic analysis**

444 For phylogenetic analysis, 139 individuals of 35 species and 14 genera of Triticeae and  
445 *Brachypodium* and *Bromus* as outgroup taxa were used (**SI Appendix, Table S5**). The sequence  
446 capture was performed as previously described(44). For each taxon, a set of overlapping probes  
447 was designed to cover each sequence at least four times. Probe sequences are listed in **Dataset**  
448 **S4**.

449

450 The sequence assembly was performed using GENEIOUS v. 10.0.9 (45). For the diploid and  
451 autotetraploid individuals, the reads were mapped simultaneously to barley *Vrs1* (AB478778)  
452 and *HvHox2* (AB490233) using the “Medium-Low Sensitivity” parameter. Only reads for  
453 which both sequences of a pair mapped were kept. For heterozygous diploid and allotetraploid  
454 individuals, the haplotype phasing consisted of mapping followed by *de novo* assembly to  
455 obtain two alleles or homoeologues per locus as previously described (46) with the following  
456 modifications: diploid heterozygous individuals were phased individual-wise. As a control the  
457 two obtained alleles from each individual were then used as references for mapping the  
458 individual’s reads. For allotetraploid individuals, the phasing was performed only on the  
459 individual of a species with the highest sequence coverage. The retrieved homoeologues were

460 then used as references (KU-8939, PI 428093). To control for potential chimeras the resulting  
461 assemblies were carefully inspected and their contigs were aligned with MAFFT v. 7.308 (47).  
462 For *Triticum aestivum*, *GNII* and *TaHox2* from Chinese Spring were used as references for read  
463 mapping. All assemblies were inspected for misalignments and coverage inconsistencies.  
464 Consensus sequences were called using the 'Highest Quality' threshold in GENEIOUS.  
465  
466 The multiple sequence alignment was performed in GENEIOUS v. 10.2.3 using MAFFT. The  
467 alignment was checked by eye and trimmed to the coding sequences. The best-fit model of  
468 nucleotide substitution was selected using JMODELTEST2 (48). The Bayesian information  
469 criterion (49) selected K80 + G out of 24 tested models. The Bayesian phylogenetic inferences  
470 was performed with MrBayes version 3.2.6 (50) on CIPRES (Cyberinfrastructure for  
471 Phylogenetic Research) Science Gateway 3.3 (51, 52). Two parallel Metropolis coupled Monte  
472 Carlo Markov chain analyses with four chains were run for six million generations sampling  
473 trees every 500 generations. Convergence of the runs was assessed using the standard deviation  
474 of split frequencies being <0.01. The continuous parameter values sampled from the chains  
475 were checked for mixing using Tracer v1.6 (<http://beast.bio.ed.ac.uk/Tracer>). A consensus tree  
476 was computed in MrBayes after removal (burn-in) of the first 25% of trees. The consensus tree  
477 was visualized in FIGTREE v. 1.4.2 (<http://tree.bio.ed.ac.uk/software/figtree>) using the node  
478 representing the most recent common ancestor of *Brachypodium* and the Triticeae as the root.

479

#### 480 **Accession numbers**

481 The gene sequences are available from DNA Data Bank of Japan (DDBJ) under accession  
482 numbers AB711370 – AB711394, AB711888 – AB711913 and NCBI GenBank under  
483 accession numbers MH134165 – MH134483. The RNA-seq data have been submitted to the  
484 European Nucleotide Archive under accession number PRJEB25119.

485

#### 486 **Acknowledgments**

487 Grains of the RISL population were kindly provided by Steven S. Xu and Justin D. Faris  
488 (USDA-ARS, Fargo, ND USA). DNA samples and grains of the Kitahonami TILLING  
489 population were kindly provided by Yoko Ono, Fuminori Kobayashi and Hirokazu Handa  
490 (NARO). The 210 EU winter wheats were kindly provided by Marion S. Röder (IPK). We thank  
491 Hiroyuki Tsuji (Yokohama City University) for providing pANDA-b vector. We also thank  
492 NBRP-wheat, Kyoto, Japan; the Nordic Genetic Resources Center (NordGen), Alnarp, Sweden;  
493 and the IPK Genebank, Gatersleben, Germany; and USDA, Idaho, USA for providing  
494 germplasm. We thank Shinji Kikuchi (Chiba University), Harumi Koyama, Mari Sakuma

495 (NIAS), Corinna Trautewig and Anne Fiebig (IPK) for excellent technical support. This work  
496 was supported by grants from the Genomics for Agricultural Innovation Program of the  
497 Ministry of Agriculture, Forestry, and Fisheries of Japan (TRS1002 to S.S. and T.K.) and a  
498 Grant-in-Aid from the Japan Society for the Promotion of Science (JSPS) Postdoctoral Fellow  
499 for Research Abroad (to S.S.); a Grant-in-Aid for Young Scientists (B) (no. 16K18635 to S.S.);  
500 the Chief Scientist of the Israel Ministry of Agriculture and Rural Development 20-10-0066 to  
501 Z.P.), the U.S. Agency for International Development Middle East Research and Cooperation  
502 (M34-037 to Z.P.) and a grant from the German Research Foundation (BL462/10).

503

#### 504 **Author contributions**

505 S.S., G.G., Z.P., T.S. and T.K. designed research. S.S., G.G., Z.G., T.O., A.T., K.S., N.B., J.B.,  
506 G.H., S.O., H.J., Y.Y., I.A., Z.P. performed experiments. M.M. analyzed NGS data. S.S., T.S.  
507 and T.K. wrote the manuscript with contributions from all coauthors.

508

#### 509 **References**

- 510 1. Barkworth EM & Bothmer R (2009) Scientific Names in the Triticeae. *Genetics and*  
511 *Genomics of the Triticeae*, eds Muehlbauer GJ & Feuillet C (Springer), Vol 7, pp 3-30.
- 512 2. Sakuma S, Salomon B, & Komatsuda T (2011) The domestication syndrome genes  
513 responsible for the major changes in plant form in the Triticeae crops. *Plant Cell*  
514 *Physiol* 52(5):738-749.
- 515 3. Bonnett OT (1966) *Inflorescences of maize, wheat, rye, barley and oats: their initiation*  
516 *and development* (University of Illinois College of Agriculture, Agricultural  
517 Experimental Station).
- 518 4. Hanif M & Langer RHM (1972) The vascular system of the spikelet in wheat (*Triticum*  
519 *aestivum*). *Annals of Botany* 36(147):721-727.
- 520 5. Sreenivasulu N & Schnurbusch T (2012) A genetic playground for enhancing grain  
521 number in cereals. *Trends in Plant Science* 17(2):91-101.
- 522 6. Guo Z & Schnurbusch T (2015) Variation of floret fertility in hexaploid wheat revealed  
523 by tiller removal. *J Exp Bot* 66(19):5945-5958.
- 524 7. Guo Z, Slafer GA, & Schnurbusch T (2016) Genotypic variation in spike fertility traits  
525 and ovary size as determinants of floret and grain survival rate in wheat. *J Exp Bot*  
526 67(14):4221-4230.
- 527 8. International Wheat Genome Sequencing C (2014) A chromosome-based draft  
528 sequence of the hexaploid bread wheat (*Triticum aestivum*) genome. *Science*  
529 345(6194):1251788.
- 530 9. Marcussen T, *et al.* (2014) Ancient hybridizations among the ancestral genomes of  
531 bread wheat. *Science* 345(6194):1250092.
- 532 10. Shitsukawa N, Kinjo H, Takumi S, & Murai K (2009) Heterochronic development of  
533 the floret meristem determines grain number per spikelet in diploid, tetraploid and  
534 hexaploid wheats. *Ann Bot* 104(2):243-251.
- 535 11. Bommert P, Satoh-Nagasawa N, Jackson D, & Hirano HY (2005) Genetics and  
536 evolution of inflorescence and flower development in grasses. *Plant Cell Physiol*  
537 46(1):69-78.
- 538 12. Gross BL & Olsen KM (2010) Genetic perspectives on crop domestication. *Trends*  
539 *Plant Sci.*



- 540 13. Lynch JP, *et al.* (2017) The impact of variation in grain number and individual grain  
541 weight on winter wheat yield in the high yield potential environment of Ireland.  
542 *European Journal of Agronomy* 87(Supplement C):40-49.
- 543 14. Feng F, *et al.* (2018) The Effect of Grain Position on Genetic Improvement of Grain  
544 Number and Thousand Grain Weight in Winter Wheat in North China. *Frontiers in*  
545 *plant science* 9:129.
- 546 15. Sukumaran S, Lopes M, Dreisigacker S, & Reynolds M (2017) Genetic analysis of  
547 multi-environmental spring wheat trials identifies genomic regions for locus-specific  
548 trade-offs for grain weight and grain number. *Theor Appl Genet*.
- 549 16. Bhusal N, Sorial AK, Sharma P, & Sareen S (2017) Mapping QTLs for grain yield  
550 components in wheat under heat stress. *PLoS One* 12(12):e0189594.
- 551 17. Liu G, *et al.* (2014) Mapping QTLs of yield-related traits using RIL population derived  
552 from common wheat and Tibetan semi-wild wheat. *Theor Appl Genet*  
553 127(11):2415-2432.
- 554 18. Wu J, *et al.* (2006) The introgression of chromosome 6P specifying for increased  
555 numbers of florets and kernels from *Agropyron cristatum* into wheat. *Theor Appl Genet*  
556 114(1):13-20.
- 557 19. Guo Z, *et al.* (2017) Genome-wide association analyses of 54 traits identified multiple  
558 loci for the determination of floret fertility in wheat. *New Phytol* 214(1):257-270.
- 559 20. Joppa LR (1993) Chromosome engineering in tetraploid wheat. *Crop Science*  
560 33(5):908-913.
- 561 21. Komatsuda T, *et al.* (2007) Six-rowed barley originated from a mutation in a  
562 homeodomain-leucine zipper I-class homeobox gene. *Proceedings of the National*  
563 *Academy of Sciences* 104(4):1424-1429.
- 564 22. Sakuma S, Pourkheirandish M, Matsumoto T, Koba T, & Komatsuda T (2010)  
565 Duplication of a well-conserved homeodomain-leucine zipper transcription factor gene  
566 in barley generates a copy with more specific functions. *Funct Integr Genomics*  
567 10(1):123-133.
- 568 23. Debernardi JM, Lin H, Chuck G, Faris JD, & Dubcovsky J (2017) microRNA172 plays  
569 a crucial role in wheat spike morphogenesis and grain threshability. *Development*  
570 144(11):1966-1975.
- 571 24. Chuck G, Meeley RB, & Hake S (1998) The control of maize spikelet meristem fate by  
572 the *APETALA2*-like gene *indeterminate spikelet1*. *Genes Dev* 12(8):1145-1154.
- 573 25. Vlad D, *et al.* (2014) Leaf shape evolution through duplication, regulatory  
574 diversification, and loss of a homeobox gene. *Science* 343(6172):780-783.
- 575 26. Gonzalez-Grandio E, *et al.* (2017) Abscisic acid signaling is controlled by a  
576 *BRANCHED1/HD-ZIP I* cascade in *Arabidopsis* axillary buds. *Proc Natl Acad Sci U S*  
577 *A* 114(2):E245-E254.
- 578 27. Sakuma S, *et al.* (2013) Divergence of expression pattern contributed to  
579 neofunctionalization of duplicated HD-Zip I transcription factor in barley. *New Phytol*  
580 197(3):939-948.
- 581 28. Stern DL (2013) The genetic causes of convergent evolution. *Nat Rev Genet*  
582 14(11):751-764.
- 583 29. Stern DL & Orgogozo V (2009) Is genetic evolution predictable? *Science*  
584 323(5915):746-751.
- 585 30. Abbo S, *et al.* (2014) Plant domestication versus crop evolution: a conceptual  
586 framework for cereals and grain legumes. *Trends Plant Sci* 19(6):351-360.
- 587 31. Golan G, Oksenberg A, & Peleg Z (2015) Genetic evidence for differential selection of  
588 grain and embryo weight during wheat evolution under domestication. *J Exp Bot*  
589 66(19):5703-5711.
- 590 32. Avni R, *et al.* (2017) Wild emmer genome architecture and diversity elucidate wheat  
591 evolution and domestication. *Science* 357(6346):93-97.
- 592 33. Miki D & Shimamoto K (2004) Simple RNAi vectors for stable and transient

- 593 suppression of gene function in rice. *Plant Cell Physiol* 45(4):490-495.  
594 34. Pellegrineschi A, *et al.* (2002) Identification of highly transformable wheat genotypes  
595 for mass production of fertile transgenic plants. *Genome* 45(2):421-430.  
596 35. Kirby EJM & Appleyard M (1981) *Cereal development guide* (Cereal Unit,  
597 Kenilworth) 1st Ed p 80.  
598 36. International Wheat Genome Sequencing C, *et al.* (2018) Shifting the limits in wheat  
599 research and breeding using a fully annotated reference genome. *Science* 361(6403).  
600 37. Bray NL, Pimentel H, Melsted P, & Pachter L (2016) Near-optimal probabilistic  
601 RNA-seq quantification. *Nat Biotechnol* 34(5):525-527.  
602 38. R Core Team (2015) R: A Language and Environment for Statistical Computing (R  
603 Foundation for Statistical Computing).  
604 39. Law CW, Chen Y, Shi W, & Smyth GK (2014) voom: Precision weights unlock linear  
605 model analysis tools for RNA-seq read counts. *Genome biology* 15(2):R29.  
606 40. Smyth GK (2005) Limma: linear models for microarray data. *Bioinformatics and  
607 computational biology solutions using R and Bioconductor*, (Springer), pp 397-420.  
608 41. Alexa A & Rahnenfuehrer J (2010) topGO: enrichment analysis for gene ontology. *R  
609 package version 2(0)*.  
610 42. Kumar S, Stecher G, & Tamura K (2016) MEGA7: Molecular Evolutionary Genetics  
611 Analysis Version 7.0 for Bigger Datasets. *Mol Biol Evol* 33(7):1870-1874.  
612 43. Bandelt HJ, Forster P, & Rohl A (1999) Median-joining networks for inferring  
613 intraspecific phylogenies. *Mol Biol Evol* 16(1):37-48.  
614 44. Bernhardt N, Brassac J, Kilian B, & Blattner FR (2017) Dated tribe-wide whole  
615 chloroplast genome phylogeny indicates recurrent hybridizations within Triticeae. *BMC  
616 Evol Biol* 17(1):141.  
617 45. Kearse M, *et al.* (2012) Geneious Basic: an integrated and extendable desktop software  
618 platform for the organization and analysis of sequence data. *Bioinformatics*  
619 28(12):1647-1649.  
620 46. Brassac J & Blattner FR (2015) Species-Level Phylogeny and Polyploid Relationships  
621 in *Hordeum* (Poaceae) Inferred by Next-Generation Sequencing and In Silico Cloning  
622 of Multiple Nuclear Loci. *Systematic biology* 64(5):792-808.  
623 47. Katoh K & Standley DM (2013) MAFFT multiple sequence alignment software version  
624 7: improvements in performance and usability. *Mol Biol Evol* 30(4):772-780.  
625 48. Darriba D, Taboada GL, Doallo R, & Posada D (2012) jModelTest 2: more models,  
626 new heuristics and parallel computing. *Nat Methods* 9(8):772.  
627 49. Schwarz G (1978) Estimating the Dimension of a Model. *Ann. Statist.* 6(2):461-464.  
628 50. Ronquist F & Huelsenbeck JP (2003) MrBayes 3: Bayesian phylogenetic inference  
629 under mixed models. *Bioinformatics* 19(12):1572-1574.  
630 51. Escobar JS, *et al.* (2011) Multigenic phylogeny and analysis of tree incongruences in  
631 Triticeae (Poaceae). *BMC Evol Biol* 11:181.  
632 52. Mason-Gamer RJ (2013) Phylogeny of a genomically diverse group of *Elymus*  
633 (Poaceae) allopolyploids reveals multiple levels of reticulation. *PLoS One*  
634 8(11):e78449.  
635  
636

637 **Figures**

638

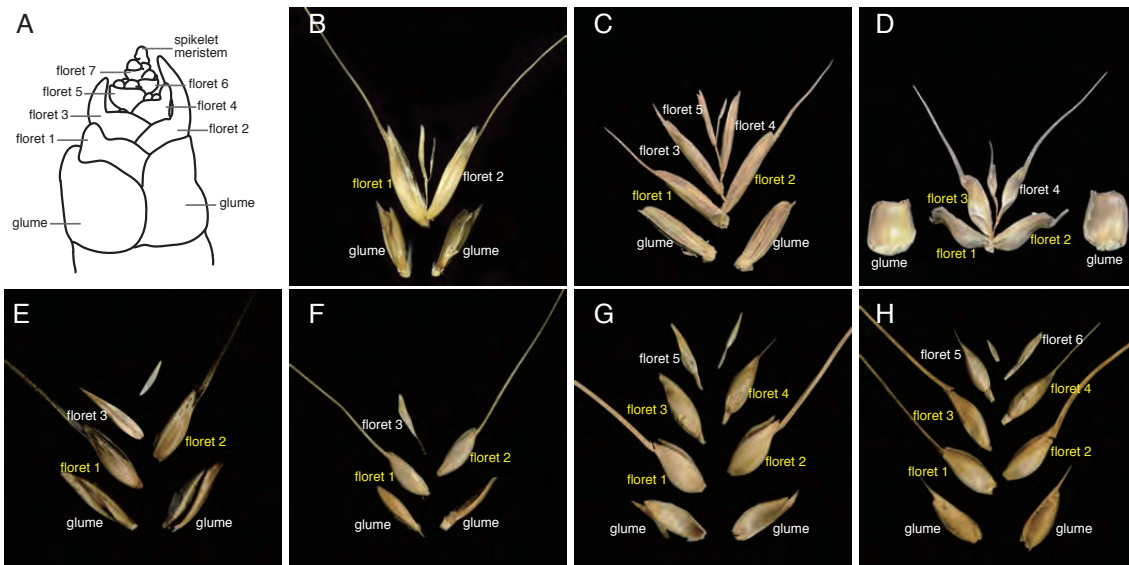

639

640 **Fig. 1.** Structure of wheat spikelet. (A) Schematic model of wheat spikelet at white anther stage

641 (35). (B–D) Diploid progenitors of bread wheat. (B) *Triticum urartu*. (C) *Aegilops speltoides*.

642 (D) *Ae. tauschii*. (E–G) Tetraploid wheat. (E) Wild emmer wheat; *T. turgidum* ssp. *dicoccoides*.

643 (F) Domesticated emmer wheat; *T. turgidum* ssp. *diccocus*. (G) Durum wheat; *T. turgidum* ssp.

644 *durum*. (H) Hexaploid bread wheat; *T. aestivum*. Yellow-labelled florets indicate fertile florets

645 producing grain.

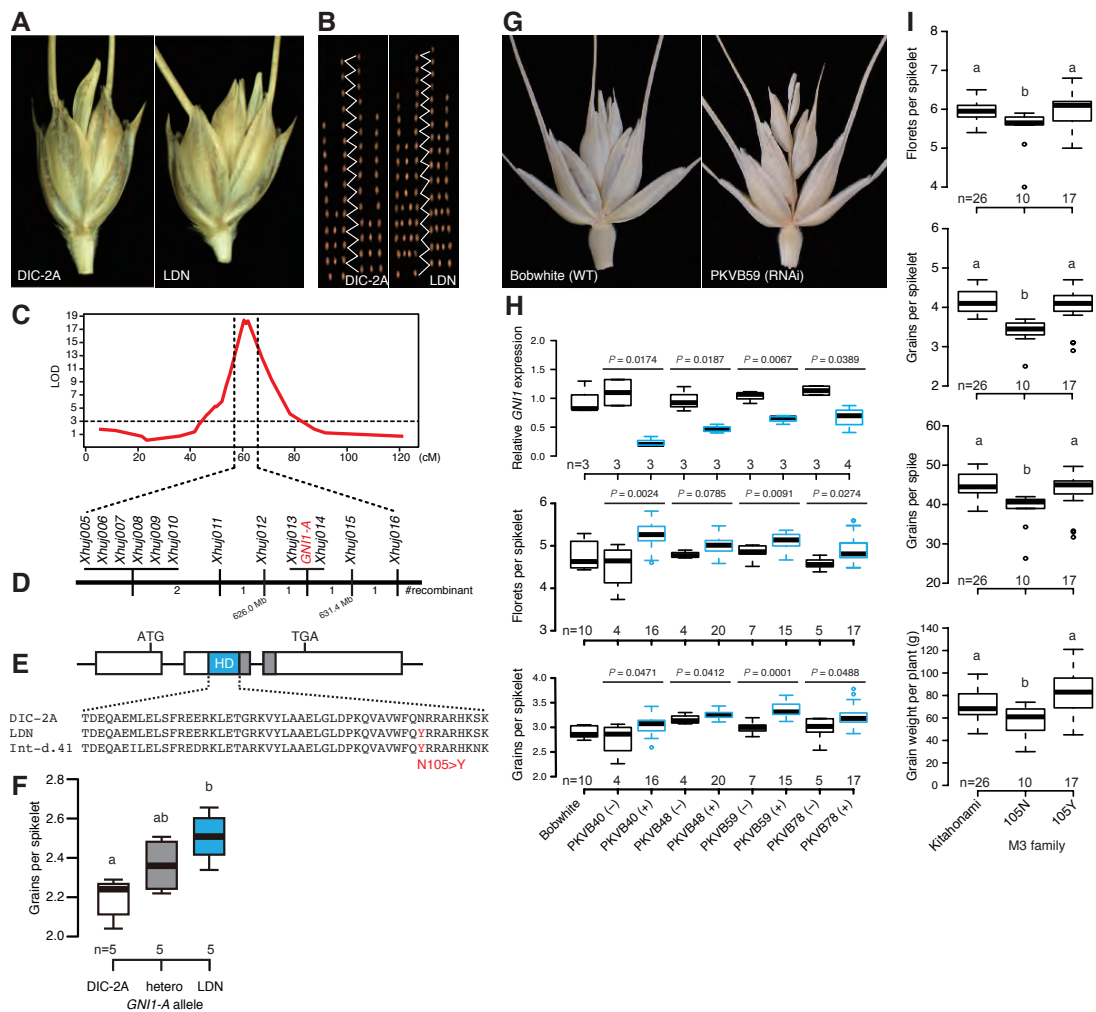

646

647 **Fig. 2.** Gene identification responsible for increased grain number per spikelet. (A)

648 Representative spikelet of DIC-2A and LDN. (B) Number of grains along the spike. (C) QTL  
 649 for grain number per spikelet on chromosome 2AL. (D) Fine mapping of the *GNII-A*. (E) Gene  
 650 structure of *GNII-A*. The LDN and *Int-d.41* allele carries a single amino acid substitution at the  
 651 homeodomain (HD). (F) Additive effect of the *GNII-A* alleles in backcrossed recombinant  
 652 lines. (G) Spikelet structure of Bobwhite and transgenic plant with *GNII-A* RNAi construct. (H)  
 653 Relative *GNII* expression level (up), number of florets (middle) and grains (bottom) per spikelet  
 654 of transgenic (+) and non transgenic (-) plants at T1 generation. *P*-values are determined by  
 655 Student's *t*-tests. (I) Phenotypes of TILLING mutants in the M3 family. 105N indicate revertant  
 656 mutant (functional) allele and 105Y wildtype (reduced-function) allele as Kitahonami. Box  
 657 edges represent the 25% quantile and 75% quantile with the median values shown by bold lines.  
 658 Whiskers extend to data less than 1.5 times the interquartile range, and remaining data are  
 659 indicated by circles. Averages with different letters in (F) and (I) indicate significant differences  
 660 as determined by Tukey HSD ( $P \leq 0.05$ ).

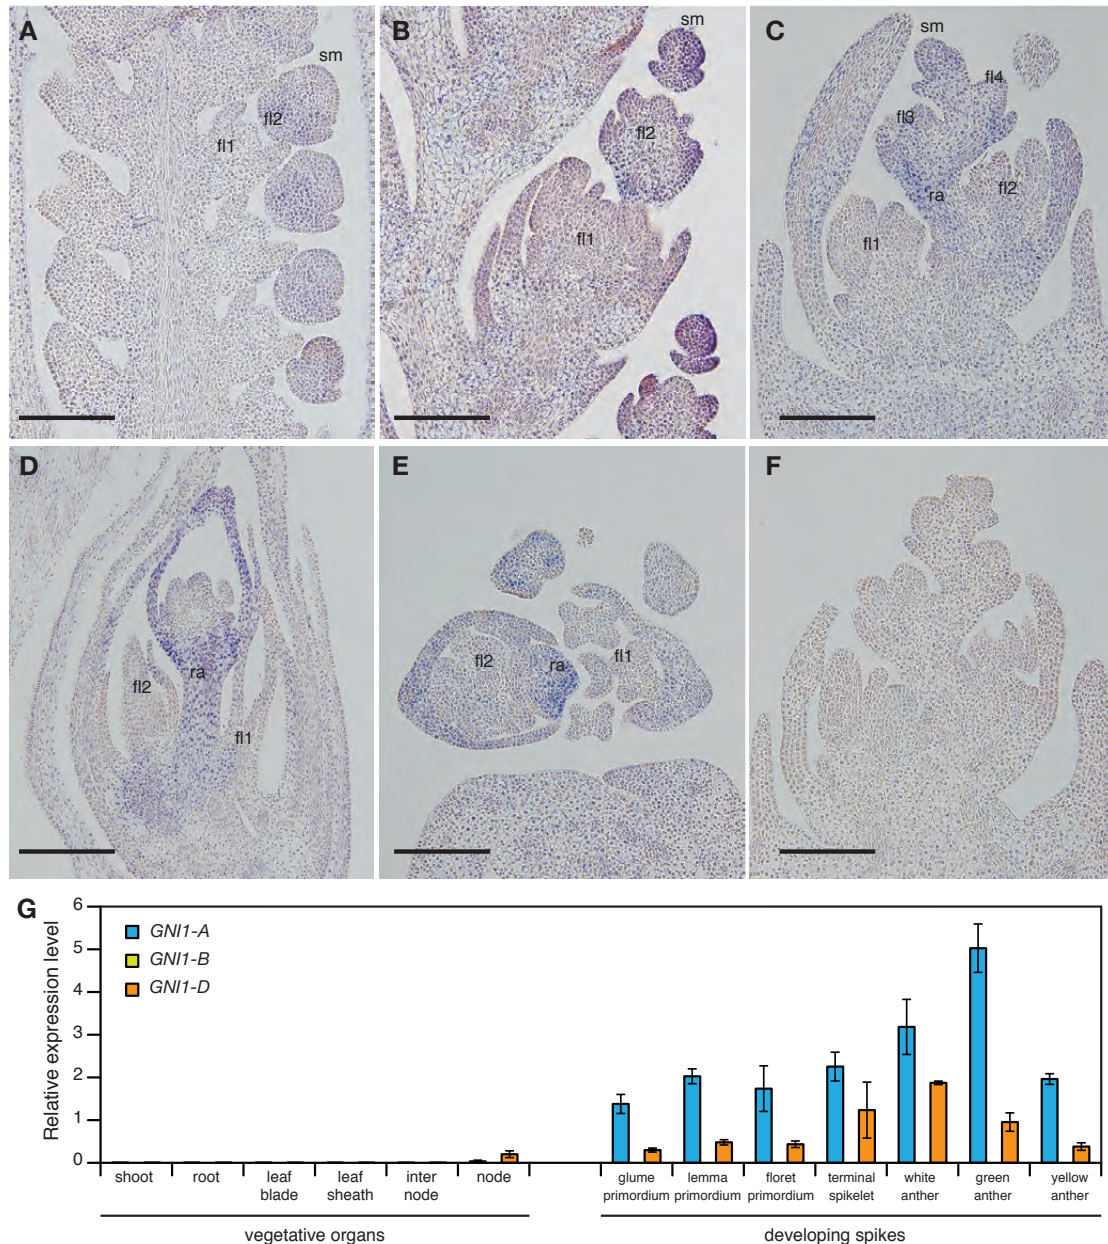

661

662

663

664

665

666

667

**Fig. 3.** Expression pattern of *GNII*. (A–F) *In situ* hybridization of *GNII* during spike development of einkorn wheat. (A) Longitudinal section at floret primordium stage. (B) Terminal spikelet stage. (C) White anther stage. (D) Green anther stage. (E) Cross section at white anther stage. (F) Control with sense probe. (G) Relative expression levels of *GNII* in bread wheat cv. Bobwhite. Means  $\pm$  SE of three biological replicates are shown. sm: spikelet meristem, fl: floret, ra: rachilla. Scale bars = 200  $\mu$ m.

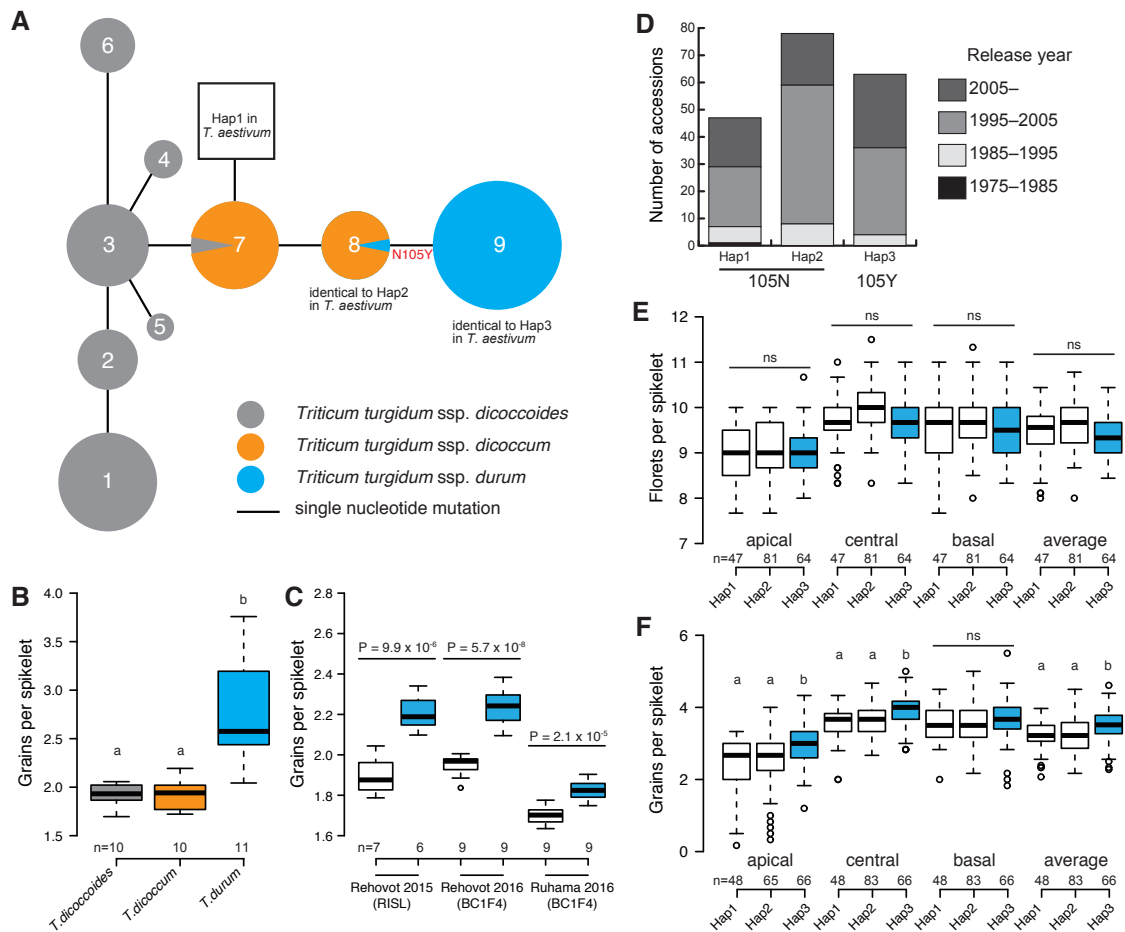

668

669

670

671

672

673

674

675

676

677

678

**Fig. 4.** Natural variation of *GNII-A*. (A) Haplotype network analysis of *GNII-A* in tetraploid wheat. The median-joining network was constructed from the haplotypes based on the resequencing of 35 wild emmer, 14 domesticated emmer and 23 durum wheat accessions. Circle sizes correspond to the frequency of individual haplotypes. Lines represent genetic distances between haplotypes. (B) Grains per spikelet in tetraploid wheat. (C) Effect of *GNII-A* allele in tetraploid wheat across environments. 13 RISLs and 18 BC1F4 lines were used. *P*-values are determined by Student's *t*-tests. (D) Frequency of three haplotypes in 210 EU winter bread wheat cultivars. (E) Number of florets per spikelet at green anther stage. (F) Hap3 (105Y) cultivars showed more grains per spikelet. Different letters in (B), (E) and (F) indicate significant differences as determined by Tukey HSD ( $P \leq 0.05$ ). ns; not significant.

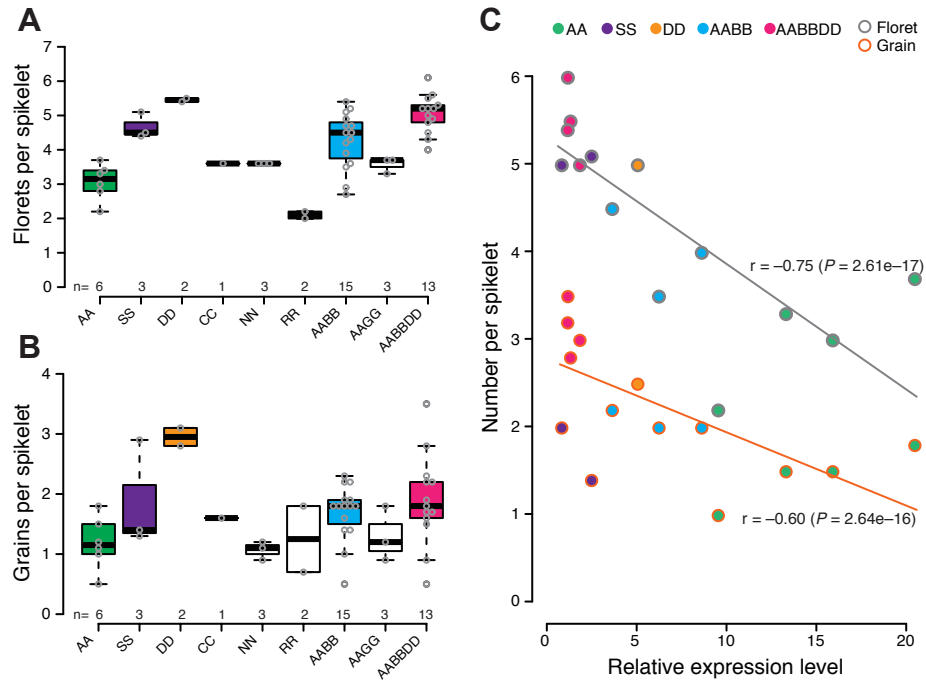

679

680 **Fig. 5.** Functions of *GNII* in diploid, tetraploid and hexaploid species. (A) Floret number per

681 spikelet. (B) Grain number per spikelet. (C) Relationship between floret/grain number per

682 spikelet and expression level of *GNII*.
